# Supplementary material for: NADP-Dependent Malic Enzyme Genes in Sweet Pepper Fruits: Involvement in Ripening and Modulation by Nitric Oxide (NO)
Source: MDPI journal article supplement (doi:10.3390/plants12122353), 2023-06-17
Supplement: s1 [file s1]

|          |                                                                       |     |
|----------|-----------------------------------------------------------------------|-----|
| NADP-ME1 | MFSLNGTTFDNLSCGISRCLTTQSRKRVSVPMVV--VSSNGRAADGNVSILMENTLKE            | 58  |
| NADP-ME5 | MFSLNGSSFTNNSLSGVSRCLTQSC--RRVSAPMVVAAVSSNGKPGDGHVSVLVENALTES         | 59  |
| NADP-ME3 | -----MISFTIPNPLRKALGKRSSGRINIRVVMESTLKEL                              | 35  |
| NADP-ME2 | -----                                                                 | 0   |
| NADP-ME4 | -----MESKMKEK                                                         | 8   |
|          |                                                                       |     |
| NADP-ME1 | ---VAVIEKDDFKSTVSGGVGDVYGEDTASEDQITPWTFSVASGYSLLRDPHYNKGGLAF          | 115 |
| NADP-ME5 | ---PVPVEK-ETKSTVTGGVGDVYGEDSATEDQSITPWTLSVASGFSLLRNPHYNKGGLAF         | 115 |
| NADP-ME3 | SNGESVLDV-KDKCGVGGGVEDLYGEDRATEDQITPWTFSVASGYSLLRDPHYNKGGLAF          | 94  |
| NADP-ME2 | -----MESTLKEQIPAGGVEDVYGEDCATEDQCITPWTIAVSSGYNLLRDPHYNKGGLAF          | 54  |
| NADP-ME4 | S--ESVVDMSPTSAVVEGGVEDIYGEDCATEDQLITPWTFOVSSGYNLLRDPHYNKGGLAF         | 66  |
|          | : : * * * * * : * * * * * : * * * * * : * * * * * : * * * * *         |     |
|          | Putative nitration                                                    |     |
| NADP-ME1 | SEKERDSHYLSGLLPPVVVDQELQVKVMNVLRQYDVPLQRYMAMMDLQERNERLIFYKLL          | 175 |
| NADP-ME5 | SERERDTHYLRGLLPPVVITHDLQVKMMNSIRKYDVPLQRYMAMMDLQEMNERLIFYKLL          | 175 |
| NADP-ME3 | TDARDAHYLRGLLPPSVSNQELQEKVMHNRLRYQVPLQRYMAMMDLQERNERLIFYKLL           | 154 |
| NADP-ME2 | TERERDAHYLRGLLPPVVSTQELQEKKLMQSIQYDPLHKYVAMMELEBNERLIFYKLL            | 114 |
| NADP-ME4 | TEQERDVHYLRGLLPPAVMPQELQEKRLMQTLRRYEVPLNKYVALMELQERNERLIFYKLL         | 126 |
|          | : : * * * * * : * * * * * : * * * * * : * * * * * : * * * * *         |     |
|          | NADP-binding site                                                     |     |
| NADP-ME1 | MENVEELLPIVYTFVTGEACQKYGSIFRKPQGLFISLKEKGKILEVLKNWPEKKIQIVIV          | 235 |
| NADP-ME5 | IDNVEELLPIVYTPVTGEACQKYGSIFRKPQGLFISLKEKGKIHVLKNWPEKKIQIVIV           | 235 |
| NADP-ME3 | IDNVEELLPVVYTPVTGEACQKYGSIFRKPQGLFISLKEKGKILEVLKNWPEKSIQIVIV          | 214 |
| NADP-ME2 | IDNVEELLPIVYTPVTGEACQKYGSIFRKPQGLYISLKEKGKILEVLKNWPEKSIQIVIV          | 174 |
| NADP-ME4 | IDNVEELLPIVYTPVTGEACQKYGSIFRKPQGLYISLKEKGKILEVLKNWPERKIQIVIVI         | 186 |
|          | : : * * * * * : * * * * * : * * * * * : * * * * * : * * * * *         |     |
|          | NADP-binding site                                                     |     |
| NADP-ME1 | TDGERILGLGDLGCQGMGIPVGKLSLYTALGGIRPSACLPTIDVGTNNKELLEDEFYIG           | 295 |
| NADP-ME5 | TDGERILGLGDLGCQGMGIPVGKLSLYTALGGIRPSACLPTIDVGTNNMNLNDEFYIG            | 295 |
| NADP-ME3 | TDGERILGLGDLGCQGMGIPVGKLSLYTALGGVRPSVCLPITIDVGTNNQQLLDDEFYIG          | 274 |
| NADP-ME2 | TDGERILGLGDLGCQGMGIPVGKLALYTALGGVRPSACLPTIDVGTNNKELNDEFYIG            | 234 |
| NADP-ME4 | TDGERILGLGDLGCQGMGIPVGKLALYTALGGVRPSACLPTIDVGTNNQQLNDEFYIG            | 246 |
|          | : : * * * * * : * * * * * : * * * * * : * * * * * : * * * * *         |     |
|          | Metal-binding residues                                                |     |
| NADP-ME1 | LRQRRARGQEYAEELLDEFMSSVKQTYGEKVLIQFEDFANHNAFDLLEKYGTSHLVFNDDI         | 355 |
| NADP-ME5 | LRQRRATGQEYAEELLDEFMYAVKQNYGEKVLIQFEDFANHNAFDLLAKYGTSHLVFNDDI         | 355 |
| NADP-ME3 | LKQKRARGQEYAEELLDEFMSAVKQNYGERVLIQFEDFANHNAFELLAKYRTHLVFNDDI          | 334 |
| NADP-ME2 | LRQNRATGQEYYDFLHEFMSAVKQNYGEKILIQFEDFANHNAFELLAKYRTHLVFNDDI           | 294 |
| NADP-ME4 | LRQKRATGKEYHDFLDEFMKAVKQNYGEKVLIQYEDFANHNAFELLAKYGTSHLVFNDDI          | 306 |
|          | : : * * * * * : * * * * * : * * * * * : * * * * * : * * * * *         |     |
| NADP-ME1 | QGTASVVLAGLMAALNLVGGNLQAHTFLFLGAGEAGTGIAELIALEMSK-----QTGAPL          | 410 |
| NADP-ME5 | QGTASVVLAGLMAALNLVGGTLAHTFLFLGAGEAGTGIAELIALEMSKQFLVLTGTIPL           | 415 |
| NADP-ME3 | QGTASVVLAGLIASLKLGGTLADHTFLFLGAGEAGTGIAELIALEITK-----KTSVPL           | 389 |
| NADP-ME2 | QGTASVVLAGLIASLKLGGALCDHTFLFLGAGEAGTGIAELIALEISK-----KTNTPV           | 349 |
| NADP-ME4 | QGTAAVVLAGLVASLKLGGSLADHTFLFFGAGEAGTGIAELIALAISK-----KTNAVP           | 361 |
|          | : : * * * * * : * * * * * : * * * * * : * * * * * : * * * * *         |     |
| NADP-ME1 | EETRKKIWMVDSKGLIVSRMESLQHFKMPWAHDHEPVKELVNAVKLKPTILIGSSGTG            | 470 |
| NADP-ME5 | EETRKKIWMVDSKGLIVKSRMEMLQHFKRPWAHDHEPVKELVNAVKSIKPTVLIGSSGTG          | 475 |
| NADP-ME3 | EVARKKIWLVDKGLIVSRRVESLQHFKKPWAHDHEPVKELIDAVKAIKPTVLIGTSGVG           | 449 |
| NADP-ME2 | EETRKKIWLVDKGLIVSRRKGTQAFKKPWAHEHEPVNNLLDAVKAVKPSVLIGTSGVG            | 409 |
| NADP-ME4 | EEARKKIWLVDKGLIVSRRKESLQAHKKPWAHEHEPVNNLLDTVKAIKPTAIIGTSGVG           | 421 |
|          | : : * * * * * : * * * * * : * * * * * : * * * * * : * * * * *         |     |
| NADP-ME1 | KTFTEKVVRTIATFNKFMVQKPVIFALSNPTSQSECTAEAEYTWSDGRAIFASGSPFAPV          | 530 |
| NADP-ME5 | RTFTKEVVQAMATFN---EKPIIFALSNPTSQSECTAEAEYSWSEGRAIFASGSPFAPV           | 531 |
| NADP-ME3 | KTFTEKVVVEAMASLN---PKPLVMALSNPTSQAECTAEAEYTWKSGHAIFASGSPFPDF          | 505 |
| NADP-ME2 | RTFTKEVVVEAMASMN---ERPLIMALSNPTSQAECTAEAEYTWSEGRAVFASGSPFPDF          | 465 |
| NADP-ME4 | RTFTKEVIEAMASIN---KRPLIMALSNPTEQSECTAEAEYAWSEGRAVFASGSPFPV            | 477 |
|          | : * * * * * : : : : * : * * * * * : * * * * * : * * * * * : * * * * * |     |
| NADP-ME1 | EYEGKVFMSGQANNAYIFPGLGLLIISGAIRVHDDMLLAASEALAAEVSKENFEKGLIY           | 590 |
| NADP-ME5 | EYKGVVYASGQANNAYIFPGFGLGLIISGAIRVHDDMLLVASEALAEQVSQENFEKGLIY          | 591 |
| NADP-ME3 | EFEGRFTVSGQANNAYIFPGFGLGLIIMSGTIRVHDDMLLAASEALAAEVTEDDYLGKRIY         | 565 |
| NADP-ME2 | EYNKLYFPQANNACYIFPGFGLVMSGTIRVHDDMLLAASEALAAQVTDDEHYAKGMIY            | 525 |
| NADP-ME4 | EYNNKLHIPSQANNACYIFPGFGLVMAIRVHNDMLLAASEALAGQVTEHYVKGIIY              | 537 |
|          | : : : . . . * * * * * : * * * * * : * * * * * : * * * * * : * * * * * |     |
| NADP-ME1 | PPFANIRKISAHIAAKVAAKAYELGLATRLPQPENLVSYAESCMYSPSYRSYR                 | 643 |
| NADP-ME5 | PPFANIRKISAHIAAKVAAKAYELGLATRLPEPKDLIAYAESCMYSPAYRSYR                 | 644 |
| NADP-ME3 | PPFTNIRKISAHIAAEVAAKAYELGLATHLPRPKDLVKYAESCMYTPVYRHYR                 | 618 |
| NADP-ME2 | PPFADIRKISAHIAARVAAKAYELGVATRLPRPADLVKYAESCMYTPNYSYR                  | 578 |
| NADP-ME4 | PPFGIIRKISAHIAANVAARAYGLVATRLPPADLVKYAESCFYSPNYRCYR                   | 590 |
|          | : * * * * * : * * * * * : * * * * * : * * * * * : * * * * *           |     |

**Supplementary Figure S1. Alignment of the five NADP-ME sequences from pepper identifying the conserved NADP (blue) and metal binding (green) sites, and the possible tyrosine (Y) residue capable of being nitrated (orange). Asterisks denote the shared amino acids among all NADP-MEs.**
